# Supplementary material for: Complete Blood Count-Derived Inflammation Indexes Are Useful in Predicting Metabolic Syndrome in Children and Adolescents with Severe Obesity
Source: MDPI journal article supplement (doi:10.3390/jcm13072120), 2024-04-05
Supplement: s1 [file s1]

**Supplementary Table S1.** Demographic, biochemical, and clinical characteristics of the study subgroups (MetS 0-2, MetS 3, MetS 4-5).

| Parameters                | MetS 0-2<br>(no. 406, 73.6%) | MetS 3<br>(no. 118, 21.4%) | MetS 4-5<br>(no. 28, 5.0%) |
|---------------------------|------------------------------|----------------------------|----------------------------|
| Age (years)               | 14.5 [12.4–15.9]             | 15.8 [14.1–16.8]           | 15.8 [13.6–16.9]           |
| Sex (no.)                 | M 151, F 255                 | M 57; F 61                 | M 11; F 17                 |
| BMI (kg/m <sup>2</sup> )  | 35.5 [32.2–39.8]             | 39.2 [35.2–42.4]           | 40.0 [36.3–42.7]           |
| WC (cm)                   | 110.0 [101.0–120.0]          | 121.5 [110.0–131.3]        | 121.0 [115.0–133.5]        |
| SBP (mmHg)                | 120.0 [110.0–125.0]          | 130.0 [130.0–140.0]        | 130.0 [130.0–140.0]        |
| DBP (mmHg)                | 80.0 [70.0–80.0]             | 80.0 [80.0–90.0]           | 80.0 [80.0–80.0]           |
| TG (mg/dL)                | 80.5 [62.0–103.3]            | 105.5 [78.2–128.3]         | 169.0 [157.8–195.3]        |
| FBG (mmol/L)              | 4.5 [4.3–4.3]                | 4.5 [2.3–4.7]              | 4.6 [4.1–4.8]              |
| Insulin (mU/L)            | 11.4 [7.9–17.3]              | 15.4 [11.0–21.3]           | 19.6 [15.6–25.1]           |
| HDL-C (mg/dL)             | 44.0 [39.8–51.0]             | 35.0 [32.0–38.0]           | 34.5 [31.2–37.7]           |
| LDL-C (mg/dL)             | 98.0 [82.0–119.0]            | 102.0 [84.7–123.0]         | 116.0 [97.2–137.5]         |
| Total cholesterol (mg/dL) | 158.5 [141.0–180.3]          | 158.0 [137.8–181.5]        | 179.0 [160.0–198.8]        |

The characteristics of the different MetS severity subgroups are displayed. The values are presented as median [interquartile range].

Abbreviations: MetS: metabolic syndrome; MetS 0–2: patients with 0 to 2 altered criteria for MetS; MetS 3: patients with 3 altered criteria for MetS; MetS 4–5: patients with 4 to 5 altered criteria for MetS; M: males; F: females; BMI: body mass index (kg/m<sup>2</sup>); WC: waist circumference (cm); SBP: systolic blood pressure (mmHg); DBP: diastolic blood pressure (mmHg); TG: triglyceride (mg/dL); FBG: fasting blood glucose (mmol/L); HDL-C: high-density lipoprotein (mg/dL); LDL: low-density lipoprotein (mg/dL).

**Supplementary Table S2.** Hematologic parameters, CBC-derived inflammation indexes, and cardiometabolic biomarkers of the study subgroups (MetS 0-2, MetS 3, MetS 4-5).

| Parameters                       | MetS 0-2<br>(no. 406, 73.6%) | MetS 3<br>(no. 118, 21.4%) | MetS 4-5<br>(no. 28, 5%) |
|----------------------------------|------------------------------|----------------------------|--------------------------|
| Leukocytes (10 <sup>9</sup> /L)  | 8.2 [7.0–9.6]                | 8.4 [7.1–9.6]              | 9.0 [7.7–10.1]           |
| Neutrophils (10 <sup>9</sup> /L) | 4.1 [3.4–5.2]                | 4.2 [3.4–5.2]              | 4.8 [3.9–5.6]            |
| Lymphocytes (10 <sup>9</sup> /L) | 3.0 [2.6–3.5]                | 3.0 [2.6–3.7]              | 3.0 [2.7–4.2]            |
| Monocytes (10 <sup>9</sup> /L)   | 0.7 [0.6–0.8]                | 0.7 [0.6–0.8]              | 0.8 [0.7–0.9]            |
| Eosinophils (10 <sup>9</sup> /L) | 0.2 [0.1–0.3]                | 0.2 [0.1–0.3]              | 0.2 [0.1–0.3]            |
| Basophils (10 <sup>9</sup> /L)   | 0.0 [0.0–0.0]                | 0.0 [0.0–0.1]              | 0.0 [0.0–0.1]            |
| MHR                              | 0.015 [0.012–0.019]          | 0.020 [0.020 –0.020 ]      | 0.020 [0.020 –0.030]     |
| LHR                              | 0.069 [0.054–0.085]          | 0.090 [0.077–0.110]        | 0.090 [0.080–0.117]      |
| NHR                              | 0.095 [0.07–0.12]            | 0.120 [0.09–0.16]          | 0.14 [0.11–0.16]         |
| SIRI                             | 0.90 [0.68–1.31]             | 0.94 [0.69–1.29]           | 1.09 [0.85–1.45]         |
| HOMA-IR                          | 2.3 [1.6–3.6]                | 3.1 [2.1–4.2]              | 3.9 [3.0–4.9]            |
| non-HDL-C                        | 114.0 [96.0–136.3]           | 121.0 [103.8–146.3]        | 146.5 [122.5–167.8]      |
| TG/HDL-C                         | 1.8 [1.3–2.5]                | 3.1 [2.2–3.9]              | 5.3 [4.5–6.1]            |

Hematologic parameters, CBC-derived inflammation indexes, and cardiometabolic parameters of the MetS subgroups are displayed.

Abbreviations: MetS: metabolic syndrome; MetS 0–2: patients with 0 to 2 altered criteria for MetS; MetS 3: patients with 3 altered criteria for MetS; MetS 4–5: patients with 4 to 5 altered criteria for MetS; MHR: monocytes-to-HDL-C ratio; LHR: lymphocytes-to-HDL-C ratio; NHR: neutrophils-to-HDL-C ratio; SIRI: systemic immune response index; HOMA-IR: homeostasis model assessment-estimated insulin resistance; non-HDL-C: non-HDL cholesterol: (total cholesterol – HDL-C); TG/HDL-C: triglycerides-to-HDL-C ratio.
